# Supplementary material for: Implications of water management representations for watershed hydrologic modeling in the Yakima River Basin
Source: Copernicus journal article supplement (doi:10.5194/hess-2018-299), 2018-07-12
Supplement: Supplementary file [file hess-2018-299-AC2-supplement.pdf]

## Responses to Reviewer #2

### Point #1

*General comment This manuscript used SWAT and RiverWare models to study the impacts of management activities such as reservoir operation and irrigation on streamflow. Human impacts on hydrology are important and interesting, and study of them is also very challenging due to the randomness and uncertainty of human activities. Thus, the study could be a good contribution to this field and the methods are reasonable.*

*However, there are some issues that need to be addressed.*

**Response:** Thank you for your valuable comments. We have revised the manuscript according to each of the comments.

### Point #2

*Specific comments 1. L20-21: may not be necessary*

**Response:** We removed this sentence from the Abstract

### Point #3

*The last paragraph of Introduction*

*needs to be rephrased. L83-85: you may want to delete this as it is better to see it after you described your results. L81: 'this study aimed to : : :' and 'Objective (1)' are nearly the same, you may want to delete one. L87-90: it is unexpected to see SWAT and RiverWare as the authors did not mention how and what method they used before.*

**Response:** Thank you for the suggestions. We agree with the reviewer that this part is a bit redundant. As a result, we removed the sentence in lines 83-85. We improved the sentence in line 81 to avoid repetition:

In addition, we move the introduction of the SWAT and RiverWare model to Conclusion.

Here is the revised paragraph:

“In recognition of the challenges in modeling hydrology in heavily managed watersheds, this study investigated impacts of water management on streamflow modeling in the YRB. Using

the YRB as a testbed, we evaluated streamflow simulations with different model representations of management activities. Objectives of this study are to (1) examine how different representations of reservoir operations influence watershed streamflow simulations, and (2) assess impacts of cropland irrigation on watershed hydrology. Methods and findings derived from this study hold the promise to provide valuable information for improving hydrologic modeling in intensively managed basins across the globe.”

**Point #4**

*L209: What are Ens and r? What are R in Figures?*

**Response:** Thank you for the suggestions. Ens and R are Nash–Sutcliffe efficiency coefficient and correlation coefficient, respectively. We introduce these two metrics in the last sentence section 2.3 (line 173-175) as follows:

“We used Nash–Sutcliffe efficiency coefficient (*Ens*) (Nash and Sutcliffe, 1970) and correlation coefficient (*R*) (Legates and McCabe, 1999) as the metrics to evaluate model performance.”

**Point #5**

*3.1 and 3.2 are results about sensitivity and performance. They should describe the results with numbers. Similarly, 3.3 and 3.4 lack numbers to support their statement. I would suggest use a few important numbers when necessary.*

**Response:** Thank you for the valuable suggestions, we added more quantitative information about our findings in sections 3.1, 3.2, 3.3, and 3.4. Specifically, we added the T and P values of the selected parameters in the sensitivity analysis.

Table S2 Parameter sensitivity under various scenarios.

| Parameters   | Description                                            | <i>T and P values for parameter sensitivity</i> <sup>1,2</sup> |                  |                  |                  |                  |
|--------------|--------------------------------------------------------|----------------------------------------------------------------|------------------|------------------|------------------|------------------|
|              |                                                        | R0                                                             | R1               | R2               | R2S1             | R2S2             |
| <b>SFTMP</b> | Snowfall temperature (°C)                              | -8.06<br>(0.00)                                                | -15.08<br>(0.00) | -12.18<br>(0.00) | -1.03<br>(0.31)  | -9.32<br>(0.00)  |
| <b>CN2</b>   | Initial SCS runoff curve number for moisture condition | -10.75<br>(0.00)                                               | -17.76<br>(0.00) | -15.25<br>(0.00) | -22.50<br>(0.00) | -11.22<br>(0.00) |
| <b>SMFMX</b> | Maximum melt rate for snow during year (occurs         | -4.89<br>(0.00)                                                | -6.72<br>(0.00)  | -2.54<br>(0.01)  | -0.32<br>(0.75)  | -3.47<br>(0.00)  |

|                      |                                                                                                                 |                 |                 |                 |                 |                 |
|----------------------|-----------------------------------------------------------------------------------------------------------------|-----------------|-----------------|-----------------|-----------------|-----------------|
|                      | on summer<br>solstice) (mm<br>H <sub>2</sub> O/°C/day)                                                          |                 |                 |                 |                 |                 |
| <b>SMTMP</b>         | Snow melt base<br>temperature (°C)                                                                              | 4.28<br>(0.00)  | 11.45<br>(0.00) | 7.91<br>(0.00)  | 0.76<br>(0.45)  | 4.43<br>(0.00)  |
| <b>CH_N2</b>         | Manning's "n"<br>value for the main<br>channel                                                                  | 3.22<br>(0.00)  | 1.69<br>(0.09)  | 2.70<br>(0.01)  | -0.73<br>(0.47) | 1.16<br>(0.25)  |
| <b>SMFMN</b>         | Minimum melt rate<br>for snow during the<br>year (occurs on<br>winter solstice)<br>(mm H <sub>2</sub> O/°C/day) | -1.19<br>(0.23) | -1.97<br>(0.05) | -0.10<br>(0.92) | -0.87<br>(0.38) | -0.77<br>(0.44) |
| <b>SLSUBBSN</b>      | Average slope<br>length (m)                                                                                     | 5.04<br>(0.00)  | 5.54<br>(0.00)  | 3.32<br>(0.00)  | 8.65<br>(0.00)  | 4.85<br>(0.00)  |
| <b>CH_N1</b>         | Manning's "n"<br>value for the<br>tributary channels                                                            | -0.18<br>(0.86) | 0.44<br>(0.66)  | 0.72<br>(0.47)  | -0.45<br>(0.65) | -0.06<br>(0.95) |
| <b>SOL_K</b>         | Saturated hydraulic<br>conductivity<br>(mm/hr)                                                                  | -2.63<br>(0.01) | -1.98<br>(0.05) | -2.49<br>(0.01) | -8.57<br>(0.00) | -2.57<br>(0.01) |
| <b>GW_REVA<br/>P</b> | Groundwater<br>"revap" coefficient                                                                              | -1.21<br>(0.23) | -1.19<br>(0.23) | 1.34<br>(0.18)  | 1.34<br>(0.18)  | -0.80<br>(0.43) |
| <b>CANMX</b>         | Maximum canopy<br>storage (mm H <sub>2</sub> O)                                                                 | 0.05<br>(0.96)  | -0.31<br>(0.75) | 0.69<br>(0.49)  | -0.06<br>(0.95) | -0.01<br>(0.99) |
| <b>HRU_SLP</b>       | Average slope<br>steepness (m/m)                                                                                | -0.87<br>(0.38) | -2.17<br>(0.03) | -0.25<br>(0.80) | -4.60<br>(0.00) | -0.46<br>(0.65) |
| <b>RES_K</b>         | Hydraulic<br>conductivity of the<br>reservoir bottom<br>(mm/hr)                                                 | -1.46<br>(0.14) | 2.14<br>(0.03)  | 0.11<br>(0.91)  | 5.33<br>(0.00)  | 0.15<br>(0.88)  |
| <b>GW_DELA<br/>Y</b> | Groundwater delay<br>(days)                                                                                     | -1.45<br>(0.15) | -0.51<br>(0.61) | 0.71<br>(0.47)  | -0.25<br>(0.81) | -1.60<br>(0.11) |
| <b>EVRSV</b>         | Lake evaporation<br>coefficient                                                                                 | -0.60<br>(0.55) | 3.36<br>(0.00)  | 0.66<br>(0.51)  | 1.37<br>(0.17)  | -0.49<br>(0.63) |
| <b>TIMP</b>          | Snow pack<br>temperature lag<br>factor                                                                          | -0.02<br>(0.98) | -0.04<br>(0.97) | -0.73<br>(0.46) | -0.06<br>(0.95) | -0.10<br>(0.92) |
| <b>ESCO</b>          | Soil evaporation<br>compensation<br>coefficient                                                                 | -0.11<br>(0.91) | -1.82<br>(0.07) | -0.13<br>(0.90) | -0.95<br>(0.34) | 0.11<br>(0.91)  |
| <b>GWQMN</b>         | Threshold water<br>level in the shallow<br>aquifer for the base<br>flow (mm)                                    | 0.26<br>(0.79)  | 0.47<br>(0.64)  | -0.82<br>(0.41) | -0.89<br>(0.38) | 0.02<br>(0.99)  |
| <b>PLAPS</b>         | Precipitation lapse<br>rate (mm H <sub>2</sub> O/km)                                                            | -0.33<br>(0.74) | -5.01<br>(0.00) | -2.70<br>(0.01) | -2.54<br>(0.01) | -0.89<br>(0.38) |
| <b>OV_N</b>          | Manning's "n"<br>value for overland<br>flow                                                                     | -2.51<br>(0.01) | 0.42<br>(0.67)  | 0.44<br>(0.66)  | 1.53<br>(0.13)  | -2.11<br>(0.04) |
| <b>REVAPMN</b>       | Threshold depth of<br>water in the<br>shallow aquifer for<br>"revap" to occur<br>(mm)                           | 0.08<br>(0.94)  | -0.23<br>(0.81) | 0.57<br>(0.57)  | 0.56<br>(0.58)  | -0.03<br>(0.98) |

|                  |                                                                          |                 |                 |                 |                 |                 |
|------------------|--------------------------------------------------------------------------|-----------------|-----------------|-----------------|-----------------|-----------------|
| <b>SOL_AWC</b>   | Available water capacity of the soil layer (mm H <sub>2</sub> O/mm soil) | 0.00<br>(1.00)  | -1.89<br>(0.06) | -0.10<br>(0.92) | -0.35<br>(0.72) | 0.63<br>(0.53)  |
| <b>NDTARGR</b>   | Number of days to reach target storage from current reservoir storage    | -1.27<br>(0.21) | 0.44<br>(0.66)  | 1.48<br>(0.14)  | 2.48<br>(0.01)  | -0.46<br>(0.65) |
| <b>ALPHA_B F</b> | Baseflow alpha factor (1/day)                                            | 0.37<br>(0.71)  | -0.47<br>(0.64) | 1.10<br>(0.27)  | 1.70<br>(0.09)  | 0.59<br>(0.55)  |
| <b>SOL_Z</b>     | Depth from soil surface to the bottom of the layer (mm)                  | 3.89<br>(0.00)  | 2.43<br>(0.01)  | 2.40<br>(0.02)  | 4.75<br>(0.00)  | 3.87<br>(0.00)  |
| <b>TLAPS</b>     | Temperature lapse rate (°C/km)                                           | -0.44<br>(0.66) | 8.91<br>(0.00)  | 1.25<br>(0.21)  | 3.02<br>(0.00)  | 0.21<br>(0.83)  |
| <b>SURLAG</b>    | Surface runoff lag coefficient                                           | -0.53<br>(0.60) | -0.03<br>(0.98) | 0.11<br>(0.91)  | 0.18<br>(0.85)  | -1.35<br>(0.18) |
| <b>EPCO</b>      | Plant uptake compensation factor                                         | 1.56<br>(0.12)  | 1.34<br>(0.18)  | -2.29<br>(0.02) | 0.66<br>(0.51)  | 1.14<br>(0.25)  |

<sup>1</sup> Format the T and P values is: T (P)

<sup>2</sup> For *P* values less than 0.01, we use “0.00” in the above table.

In section 3.2, we added a table to summary all evaluation metrics for the four selected subbasins.

Table S1. SWAT performances in the five scenarios during the calibration and validation period

| Metrics<br>Scenarios |          | Calibration |          | validation |          |
|----------------------|----------|-------------|----------|------------|----------|
|                      |          | <i>Ens</i>  | <i>R</i> | <i>Ens</i> | <i>R</i> |
| R0                   | Site 67  | 0.204       | 0.532    | -0.480     | 0.297    |
|                      | Site 99  | 0.377       | 0.620    | -0.093     | 0.452    |
|                      | Site 160 | 0.229       | 0.479    | 0.013      | 0.498    |
|                      | Site 171 | 0.216       | 0.469    | 0.519      | 0.590    |
| R1                   | Site 67  | 0.249       | 0.501    | 0.288      | 0.538    |
|                      | Site 99  | 0.281       | 0.557    | 0.276      | 0.543    |
|                      | Site 160 | 0.440       | 0.671    | 0.245      | 0.503    |
|                      | Site 171 | 0.427       | 0.666    | 0.326      | 0.578    |
| R2                   | Site 67  | 0.311       | 0.560    | 0.312      | 0.589    |
|                      | Site 99  | 0.298       | 0.585    | 0.322      | 0.575    |
|                      | Site 160 | 0.404       | 0.648    | 0.246      | 0.511    |
|                      | Site 171 | 0.360       | 0.653    | 0.318      | 0.575    |
| R2S1                 | Site 67  | 0.372       | 0.631    | 0.221      | 0.531    |
|                      | Site 99  | 0.423       | 0.664    | 0.228      | 0.506    |
|                      | Site 160 | 0.282       | 0.534    | 0.213      | 0.512    |
|                      | Site 171 | 0.280       | 0.536    | 0.291      | 0.576    |

|      |          |       |       |        |       |
|------|----------|-------|-------|--------|-------|
| R2S2 | Site 67  | 0.094 | 0.362 | -0.451 | 0.595 |
|      | Site 99  | 0.074 | 0.388 | -0.874 | 0.429 |
|      | Site 160 | 0.343 | 0.613 | -0.883 | 0.252 |
|      | Site 171 | 0.364 | 0.618 | -0.148 | 0.368 |

*Ens* and *R* are Nash–Sutcliffe efficiency coefficient and correlation coefficient, respectively

In sections 3.3 and 3.4, we compared averages in water fluxes (ET and streamflow) to show differences among the scenarios.

### Point #6

*The quality of Figures 6 and 7 can be improved.*

**Response:** We improved the two figures by changing the dashed lines of model simulations to solid lines:

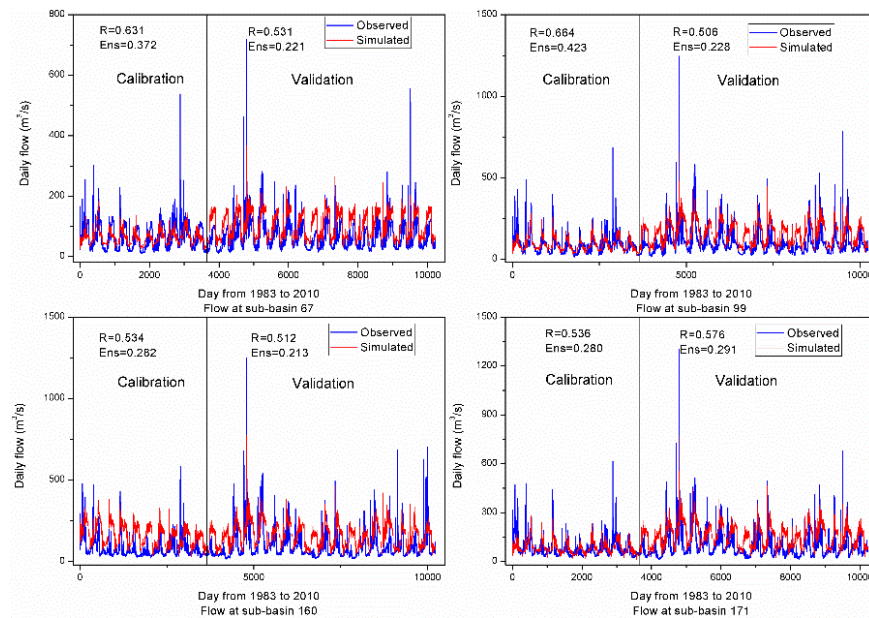

Figure 6

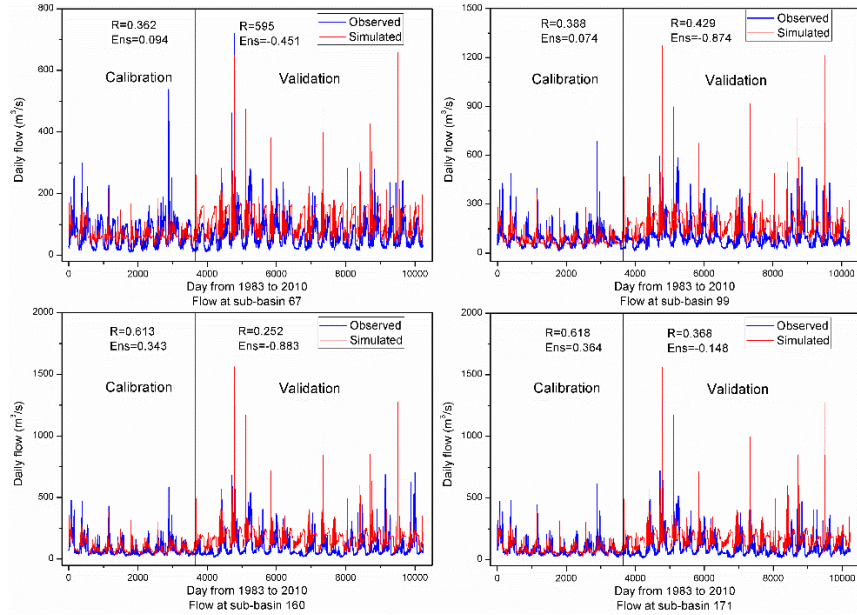

**Figure 7**

Point #7

*There is a grammar issue for Caption of Figure 5.*

**Response:** we improved the caption as follows:

“Figure 5 Monthly and annual ET simulated under reservoir operation only scenarios (R0, R1, and R2). “
